# Supplementary material for: Fecal microbiota of horses with colitis and its association with laminitis and survival during hospitalization
Source: PubMed Central journal article supplement (PMC9708523; doi:10.1111/jvim.16562), 2022-10-21
Supplement: JVIM-36-2213-s001.pdf [file JVIM-36-2213-s001.pdf]

**Supplementary Table 2.** Alpha diversity comparisons of the Chao, Shannon Evenness, and Inverse Simpson's indices of laminitis and non-laminitis horses and surviving and non-surviving horses.

| <b>Index</b>                           | <b>Laminitis<br/>N = 15</b> | <b>Non- laminitis<br/>N = 39</b> | <b>Survivors<br/>N = 27</b> | <b>Non-survivors<br/>N = 28</b> |
|----------------------------------------|-----------------------------|----------------------------------|-----------------------------|---------------------------------|
| <b>Chao-1<br/>(richness)</b>           | 180<br>[125-344]            | 175<br>[108-319]                 | 187<br>[108-319]            | 172<br>[111-344]                |
| <b>Shannon Evenness<br/>(evenness)</b> | 0.5<br>[0.4-0.6]            | 0.6<br>[0.07-0.6]                | 0.6<br>[0.07-0.6]           | 0.5<br>[0.3-0.6]                |
| <b>Inverse Simpson<br/>(diversity)</b> | 8<br>[3-13]                 | 10<br>[1-16]                     | 10<br>[1-16]                | 8<br>[2-16]                     |

P-values were obtained with the Wilcoxon test. \* Represents statistical difference between groups (p = .049\*). Median and range were included for each group. One horse with chronic laminitis was removed from the laminitis analysis.
