# Supplementary material for: Fecal microbiota of horses with colitis and its association with laminitis and survival during hospitalization
Source: PubMed Central journal article supplement (PMC9708523; doi:10.1111/jvim.16562), 2022-10-21
Supplement: JVIM-36-2213-s002.pdf [file JVIM-36-2213-s002.pdf]

**Supplementary Table 4.** Relative abundance (median (%) and range) of the most abundant taxa identified in healthy horses and survival and non-surviving diarrheic horses.

| Phylum          | Family                  | Genus                            | Healthy<br>n = 36                  | Survivors<br>n = 27                | Non-Survivors<br>n = 28           |
|-----------------|-------------------------|----------------------------------|------------------------------------|------------------------------------|-----------------------------------|
| Bacteroidetes   | Unclass.                | Unclass.                         | 20.5 <sup>a</sup> [12.8 – 35.5]    | 1.4 <sup>b</sup> [0.014 – 15.9]    | 0.94 <sup>b</sup> [0.011 – 14.0]  |
| Firmicutes      | Lachnospiraceae         | Unclass.                         | 8.7 <sup>a</sup> [1.5 – 20.8]      | 5.2 <sup>a</sup> [0.43 – 18.5]     | 4.9 <sup>a</sup> [0.023 – 32.2]   |
| Firmicutes      | Ruminococcaceae         | Unclass.                         | 6.8 <sup>a</sup> [1.4 – 12.5]      | 3.6 <sup>a</sup> [0.22 – 20.5]     | 1.6 <sup>a</sup> [0.021 – 22.8]   |
| Firmicutes      | Clostridiales Unclass.  | Unclass.                         | 5.4 <sup>a</sup> [0.75 – 8.4]      | 5.3 <sup>a</sup> [0.023 – 21.2]    | 4.9 <sup>a</sup> [0.014 – 14.0]   |
| Verrucomicrobia | 5_family_incertae_sedis | 5_genus_incertae_sedis           | 6.7 <sup>a</sup> [1.7 – 16.5]      | 1.0 <sup>b</sup> [0.0041 – 9.5]    | 0.15 <sup>b</sup> [0.0051 – 4.2]  |
| Firmicutes      | Streptococcaceae        | <i>Streptococcus</i>             | 0.026 <sup>a</sup> [0 – 7.5]       | 0.64 <sup>b</sup> [0.01 – 34.7]    | 1.9 <sup>b</sup> [0.0059 – 54.1]  |
| Firmicutes      | Clostridiaceae_1        | <i>Clostridium_sensu_stricto</i> | 0.058 <sup>a</sup> [0.00090 – 1.6] | 1.8 <sup>b</sup> [0.0008 – 66.4]   | 0.37 <sup>b</sup> [0.0032 – 43.5] |
| Firmicutes      | Enterococcaceae         | <i>Enterococcus</i>              | 0.0014 <sup>a</sup> [0 – 0.026]    | 0.18 <sup>b</sup> [0.0017 – 17.4]  | 0.30 <sup>b</sup> [0.0048 – 94.5] |
| Firmicutes      | Unclass.                | Unclass.                         | 2.8 <sup>a</sup> [0.43 – 5.8]      | 2.0 <sup>a</sup> [0.015 – 7.8]     | 1.5 <sup>a</sup> [0.012 – 8.4]    |
| Bacteroidetes   | Bacteroidales Unclass   | Unclass.                         | 4.7 <sup>a</sup> [0.49 – 6.9]      | 0.20 <sup>b</sup> [0.0077 – 14.0]  | 0.18 <sup>b</sup> [0.0023 – 1.9]  |
| Verrucomicrobia | Verrucomicrobiaceae     | <i>Akkermansia</i>               | 0.061 <sup>a</sup> [0.0026 – 1.8]  | 0.65 <sup>ab</sup> [0.0085 – 26.5] | 0.65 <sup>b</sup> [0.0007 – 46.2] |
| Spirochaetes    | Spirochaetaceae         | <i>Treponema</i>                 | 3.4 <sup>a</sup> [1.1 – 7.9]       | 0.12 <sup>b</sup> [0.0008 – 2.9]   | 0.055 <sup>b</sup> [0.0007 – 2]   |
| Firmicutes      | Lactobacillaceae        | <i>Lactobacillus</i>             | 0.069 <sup>a</sup> [0.0034 – 1.1]  | 0.15 <sup>b</sup> [0.0063 – 33.3]  | 0.50 <sup>ab</sup> [0.0051 – 9.4] |
| Proteobacteria  | Moraxellaceae           | <i>Acinetobacter</i>             | 0.016 <sup>a</sup> [0.0006 – 8.8]  | 0.025 <sup>a</sup> [0.0007 – 40.3] | 0.011 <sup>a</sup> [0 – 27.8]     |
| Actinobacteria  | Coriobacteriaceae       | Unclass.                         | 0.45 <sup>a</sup> [0.040 – 4.2]    | 1.7 <sup>ab</sup> [0.0048 – 9.5]   | 1.2 <sup>b</sup> [0.0014 – 17.4]  |
| Verrucomicrobia | Unclass.                | Unclass.                         | 0.14 <sup>a</sup> [0.013 – 0.37]   | 0.0039 <sup>a</sup> [0 – 0.27]     | 0.0006 <sup>a</sup> [0 – 0.12]    |
| Proteobacteria  | Enterobacteriaceae      | Unclass.                         | 0.0051 <sup>a</sup> [0 – 0.14]     | 0.085 <sup>b</sup> [0 – 38.7]      | 0.17 <sup>b</sup> [0.0046 – 18.8] |
| Firmicutes      | Eubacteriaceae          | <i>Mogibacterium</i>             | 0.21 <sup>a</sup> [0.020 – 2.0]    | 1.8 <sup>ab</sup> [0.0033 – 12.0]  | 0.68 <sup>b</sup> [0.0022 – 14.6] |
| Firmicutes      | Lachnospiraceae         | <i>Blautia</i>                   | 0.16 <sup>a</sup> [0.013 – 2.2]    | 1.0 <sup>a</sup> [0.0071 – 46.0]   | 0.23 <sup>a</sup> [0.0028 – 4.7]  |

Unclass, Unclassified taxonomy from the from the earlier identified taxonomic group. P-values obtained using Steel Dwass test for multiple comparisons and corrected with Benjamini and Hochberg's false discovery rate analysis (FDR). P-values with a FDR adjustment of < .05 were considered significant. Superscript letters indicate within row comparisons that are significantly different.
