# Supplementary material for: Fecal microbiota of horses with colitis and its association with laminitis and survival during hospitalization
Source: PubMed Central journal article supplement (PMC9708523; doi:10.1111/jvim.16562), 2022-10-21

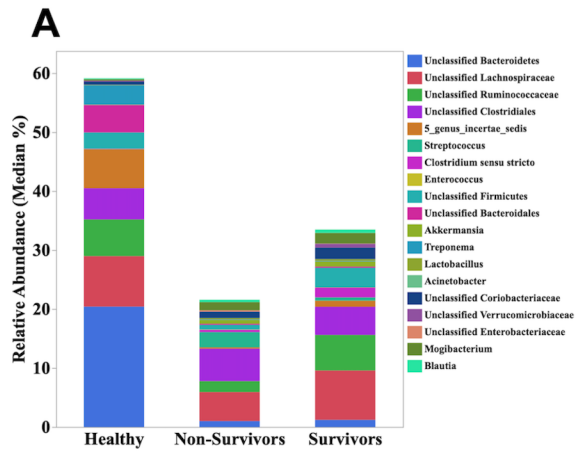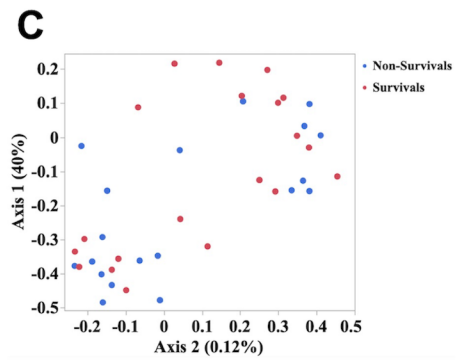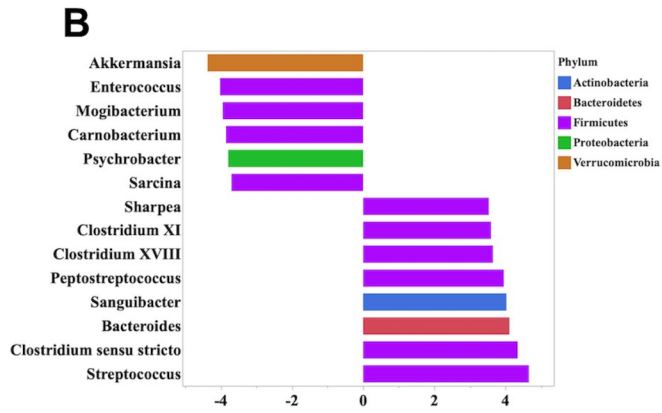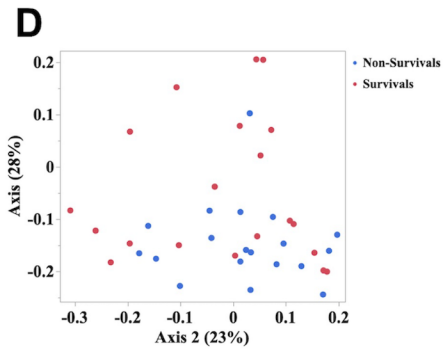

Supplement: JVIM-36-2213-s004.pdf [file JVIM-36-2213-s004.pdf]
