# Supplementary material for: Fecal microbiota of horses with colitis and its association with laminitis and survival during hospitalization
Source: PubMed Central journal article supplement (PMC9708523; doi:10.1111/jvim.16562), 2022-10-21
Supplement: JVIM-36-2213-s005.pdf [file JVIM-36-2213-s005.pdf]

**Supplementary Table 1:** Alpha diversity comparisons of the Chao, Shannon Evenness, and Inverse Simpson's indices of healthy horses and horses with colitis.

| <b>Index</b>                           | <b>Healthy<br/>N = 36</b> | <b>Colitis<br/>N = 55</b> | <b>P- values</b> |
|----------------------------------------|---------------------------|---------------------------|------------------|
| <b>Chao-1<br/>(richness)</b>           | 167<br>[129 – 241]        | 180<br>[108 – 344]        | 0.11             |
| <b>Shannon Evenness<br/>(evenness)</b> | 0.6<br>[0.5 – 0.6]        | 0.6<br>[0.07 – 0.6]       | 0.86             |
| <b>Inverse Simpson<br/>(diversity)</b> | 9<br>[6 – 17]             | 9<br>[1 – 16]             | 0.72             |

P-values were obtained with the Wilcoxon test. Median and range were included for each group.
